# Supplementary material for: Unique Peptides of Cathelicidin-1 in the Early Detection of Mastitis—In Silico Analysis
Source: MDPI journal article supplement (doi:10.3390/ijms241210160), 2023-06-15
Supplement: s1 [file s1]

# Unique Peptides of Cathelicidin-1 in the Early Detection of Mastitis—In Silico Analysis

Maria V. Bourganou, Evangelos Kontopodis, George Th. Tsangaris, Vasileios Pierros, Natalia G.C. Vasileiou, Vasia S. Mavrogianni, George C. Fthenakis and Angeliki I. Katsafadou

**Figure S1.** Mean spot densities of cathelicidin-1 in 2-DE gels obtained from sequential milk whey samples from inoculated or uninoculated side of the udder <sup>1</sup>, subsequently to inoculation of one gland with *Mannheimia haemolytica* or *Staphylococcus chromogenes* [modified from Katsafadou et al. 2019 <sup>2</sup>].

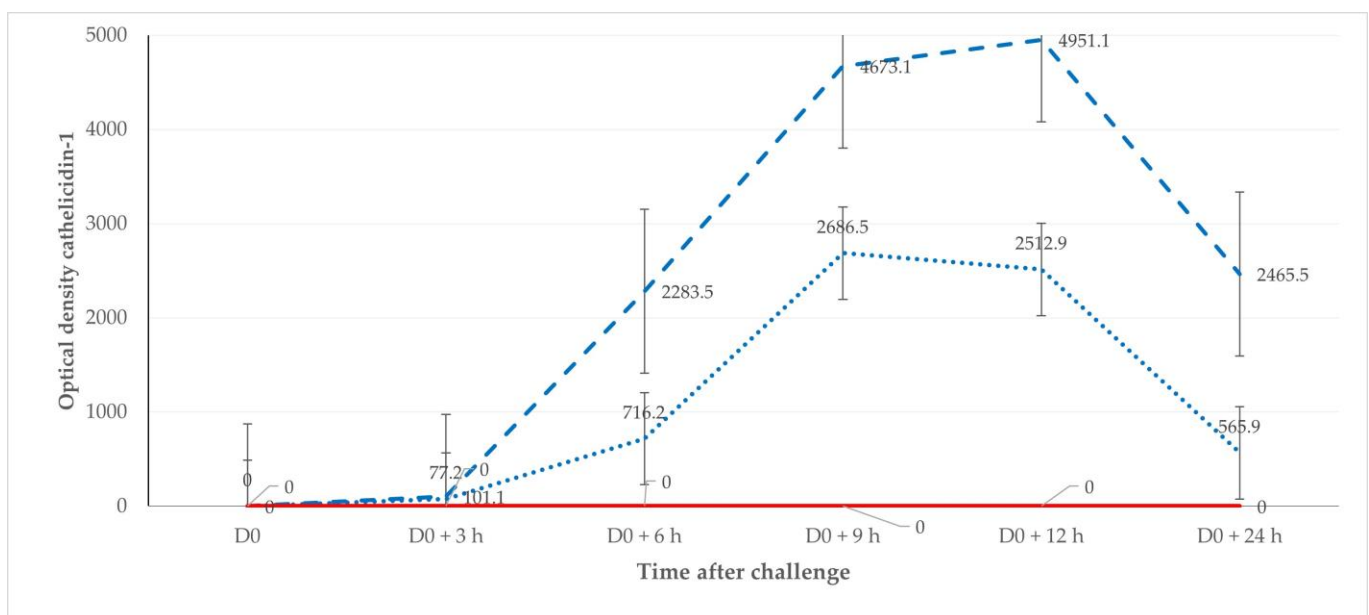

<sup>1</sup> Dashed blue line: glands inoculated with *M. haemolytica*, dotted blue line: glands inoculated with *Staphylococcus chromogenes*, red line: uninoculated glands.

<sup>2</sup> Katsafadou, A.I.; Tsangaris, G.Th.; Vasileiou, N.G.C.; Ioannidi, K.S.; Anagnostopoulos, A.K.; Billinis, C.; Fragkou, I.A.; Papadopoulos, E.; Mavrogianni, V.S.; Michael, C.K.; Addis, M.F.; Fthenakis, G.C. Detection of cathelicidin-1 in the milk as an early indicator of mastitis in ewes. *Pathogens* **2019**, *8*, 270.

**Figure S2.** Log<sub>10</sub> of mean spot densities of cathelicidin-1 in 2-DE gels and mean California Mastitis Test scores <sup>1</sup> in sequential milk samples from inoculated side of the udder, subsequently to intramammary infection <sup>2</sup> [modified from Katsafadou et al. 2019 <sup>3</sup>].

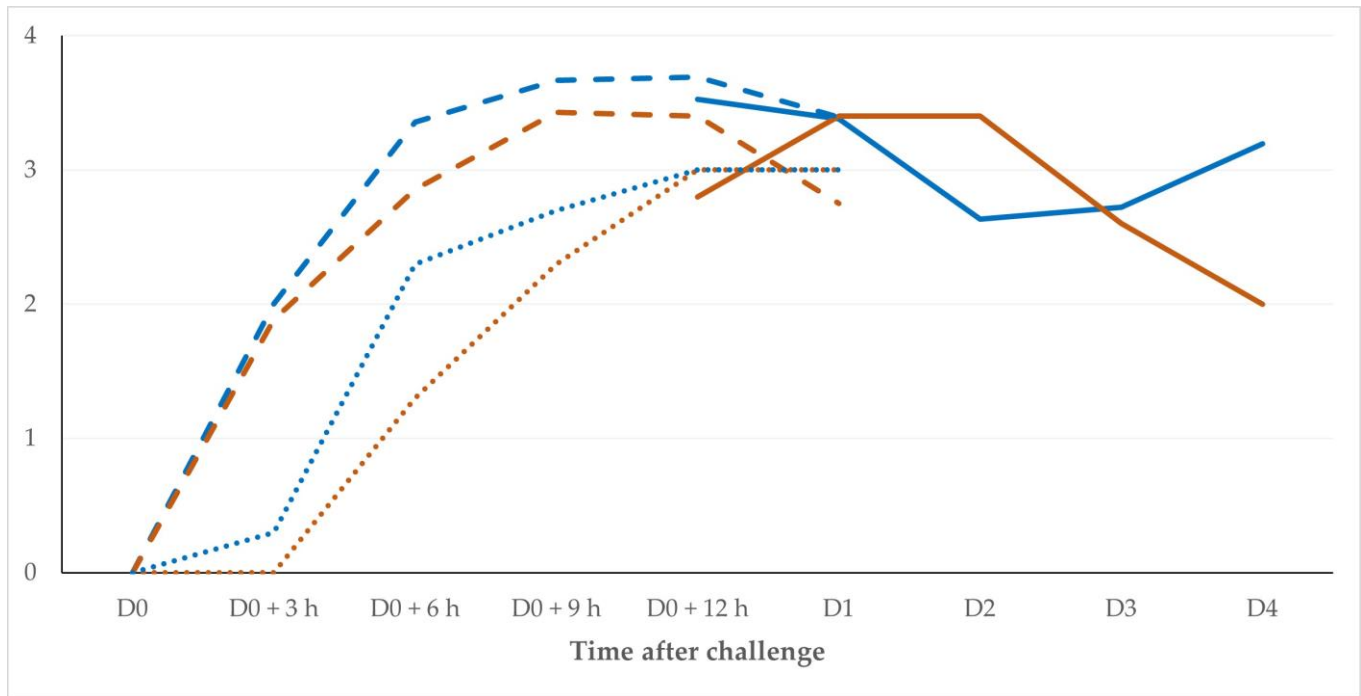

<sup>1</sup> blue lines 2-DE gels, brown lines: California Mastitis Test scores

<sup>2</sup> solid and dashed lines: inoculation with *Mannheimia haemolytica*, dotted lines: inoculation with *Staphylococcus chromogenes*.

<sup>3</sup> Katsafadou, A.I.; Tsangaris, G.Th.; Vasileiou, N.G.C.; Ioannidi, K.S.; Anagnostopoulos, A.K.; Billinis, C.; Fragkou, I.A.; Papadopoulos, E.; Mavrogianni, V.S.; Michael, C.K.; Addis, M.F.; Fthenakis, G.C. Detection of cathelicidin-1 in the milk as an early indicator of mastitis in ewes. *Pathogens* **2019**, *8*, 270.

**Table S1.** 2 × 2 contingency table indicating number of milk samples from mammary glands with mastitis ('positive' (+) or 'negative' (-)) in relation to presence of cathelicidin-1 therein ('positive' (+) or 'negative' (-)) [modified from Katsafadou et al. 2019 <sup>1</sup>].

(a) Inoculation with *Mannheimia haemolytica*

|                            |   | Presence of mastitis |    |
|----------------------------|---|----------------------|----|
|                            |   | +                    | -  |
| Presence of cathelicidin-1 | + | 20                   | 16 |
|                            | - | 3                    | 51 |

(b) Inoculation with *Staphylococcus chromogenes*

|                            |   | Presence of mastitis |    |
|----------------------------|---|----------------------|----|
|                            |   | +                    | -  |
| Presence of cathelicidin-1 | + | 11                   | 4  |
|                            | - | 0                    | 21 |

<sup>1</sup> Katsafadou, A.I.; Tsangaris, G.Th.; Vasileiou, N.G.C.; Ioannidi, K.S.; Anagnostopoulos, A.K.; Billinis, C.; Fragkou, I.A.; Papadopoulos, E.; Mavrogianni, V.S.; Michael, C.K.; Addis, M.F.; Fthenakis, G.C. Detection of cathelicidin-1 in the milk as an early indicator of mastitis in ewes. *Pathogens* **2019**, *8*, 270.

**Table S2.** Characteristics of proteins that were searched for the analysis of cathelicidin-1 against them.

| Outcome                                    | Proteins of sheep origin | Proteins of cattle origin | Proteins of goat origin |
|--------------------------------------------|--------------------------|---------------------------|-------------------------|
| Proteins (reviewed)                        | 460                      | 6036                      | 120                     |
| Proteins with unique peptides              | 459                      | 6030                      | 118                     |
| Core unique peptides in the above proteins | 94,011                   | 1,646,928                 | 21,457                  |
| Density of core unique peptides            | 0.66%                    | 0.68%                     | 0.76%                   |
| Composite unique peptides                  | 1060                     | 12,459                    | 179                     |
| Density of composite unique peptides       | 0.75%                    | 0.51%                     | 0.63%                   |
| Unique coverage                            | 94%                      | 96%                       | 93%                     |

**Table S3.** Details of core unique peptides found in cathelicidin-1 of sheep or cattle origin.

| Start absolute position <sup>1</sup> | Cathelicidin-1 of sheep origin   |                     | Cathelicidin-1 of cattle origin  |        |
|--------------------------------------|----------------------------------|---------------------|----------------------------------|--------|
|                                      | Sequence of core unique peptides | Length <sup>2</sup> | Sequence of core unique peptides | Length |
| 1                                    |                                  |                     | METPR                            | 5      |
| 2                                    |                                  |                     | ETPRA                            | 5      |
| 3                                    |                                  |                     | TPRASL                           | 6      |
| 4                                    |                                  |                     | PRASLS                           | 6      |
| 31                                   | VLSYREAVLRAV                     | 12                  |                                  |        |
| 43                                   |                                  |                     | DQLNEQ                           | 6      |
| 44                                   | QLNEQ                            | 5                   |                                  |        |
| 45                                   |                                  |                     | LNEQS                            | 5      |
| 46                                   | NEQS                             | 4                   | NEQSSE                           | 6      |
| 47                                   | EQSSE                            | 5                   | EQSSEPN                          | 7      |
| 48                                   | QSSEP                            | 5                   | QSSEPNI                          | 7      |
| 49                                   | SSEPN                            | 5                   |                                  |        |
| 51                                   | EPNI                             | 4                   | EPNIY                            | 5      |
| 52                                   |                                  |                     | PNIYRL                           | 6      |
| 53                                   | NIYR                             | 4                   |                                  |        |
| 54                                   | IYRL                             | 4                   | IYRLLE                           | 6      |
| 57                                   |                                  |                     | LLELDQ                           | 6      |
| 58                                   | LELDQ                            | 5                   |                                  |        |
| 59                                   | ELDQP                            | 5                   | ELDQP                            | 5      |
| 60                                   |                                  |                     | LDQPP                            | 5      |
| 61                                   | DQPP                             | 4                   | DQPPQ                            | 5      |
| 63                                   |                                  |                     | PPQDD                            | 5      |
| 64                                   | PQDD                             | 4                   | PQDDE                            | 5      |
| 65                                   | QDDED                            | 5                   | QDDEDP                           | 6      |
| 66                                   |                                  |                     | DDEDPD                           | 6      |
| 67                                   | DEDP                             | 4                   | DEDPDS                           | 6      |
| 68                                   | EDPD                             | 4                   | EDPDSP                           | 6      |
| 69                                   | DPDS                             | 4                   | DPDSPK                           | 6      |
| 70                                   | PDSPK                            | 5                   | PDSPKR                           | 6      |
| 71                                   | DSPKR                            | 5                   | DSPKRV                           | 6      |
| 72                                   | SPKRV                            | 5                   | SPKRVS                           | 6      |
| 73                                   | PKRVS                            | 5                   | PKRVSF                           | 6      |
| 74                                   | KRVSF                            | 5                   |                                  |        |
| 75                                   | RVSFR                            | 5                   | RVSFR                            | 5      |
| 79                                   | RVKETVCPRTT                      | 11                  |                                  |        |
| 81                                   |                                  |                     | KETVCS                           | 6      |
| 82                                   |                                  |                     | ETVCSR                           | 6      |
| 84                                   |                                  |                     | VCSRT                            | 5      |
| 86                                   |                                  |                     | SRTTQ                            | 5      |
| 87                                   |                                  |                     | RTTQQ                            | 5      |

|     |              |    |               |    |
|-----|--------------|----|---------------|----|
| 88  |              |    | TTQQPP        | 6  |
| 89  | TQQPPEQ      | 7  | TQQPPE        | 6  |
| 90  |              |    | QQPPEQ        | 6  |
| 92  |              |    | PPEQCDFKENGLL | 13 |
| 93  | PEQCDFKENGLL | 12 |               |    |
| 101 |              |    | NGLLKR        | 6  |
| 102 | GLLKR        | 5  | GLLKRC        | 6  |
| 103 | LLKRC        | 5  |               |    |
| 104 |              |    | LKRCE         | 5  |
| 105 | KRCE         | 4  |               |    |
| 106 | RCEG         | 4  | RCEGT         | 5  |
| 107 | CEGTV        | 5  | CEGTV         | 5  |
| 108 | EGTVT        | 5  | EGTVTLD       | 7  |
| 111 |              |    | VTLDQVR       | 7  |
| 114 |              |    | DQVRG         | 5  |
| 115 | QVRG         | 4  | QVRGN         | 5  |
| 116 | VRGNF        | 5  | VRGNF         | 5  |
| 117 |              |    | RGNFDI        | 6  |
| 118 | GNFD         | 4  | GNFDIT        | 6  |
| 119 |              |    | NFDITCN       | 7  |
| 122 | ITCN         | 4  |               |    |
| 123 | TCNN         | 4  | TCNNH         | 5  |
| 124 | CNNH         | 4  | CNNHQ         | 5  |
| 125 | NNHQ         | 4  | NNHQS         | 5  |
| 126 |              |    | NHQSI         | 5  |
| 127 | HQSI         | 4  | HQSIR         | 5  |
| 128 |              |    | QSIRIT        | 6  |
| 129 | SIRI         | 4  |               |    |
| 130 | IRIT         | 4  | IRITK         | 5  |
| 131 | RITKQ        | 5  | RITKQP        | 6  |
| 133 | TKQP         | 4  | TKQPW         | 5  |
| 134 | KQPW         | 4  |               |    |
| 135 |              |    | QPWAP         | 5  |
| 136 | PWAP         | 4  | PWAPPQ        | 6  |
| 137 | WAPPQ        | 5  | WAPPQA        | 6  |
| 138 | APPQA        | 5  | APPQAA        | 6  |
| 139 | PPQAA        | 5  | PPQAAR        | 6  |
| 140 | PQAAR        | 5  | PQAARL        | 6  |
| 141 | QAARI        | 5  | QAARLC        | 6  |
| 142 |              |    | AARLCR        | 6  |
| 143 | ARICR        | 5  |               |    |
| 144 |              |    | RLCRI         | 5  |
| 145 | ICRI         | 4  | LCRIV         | 5  |
| 146 | CRIF         | 5  | CRIVV         | 5  |

|     |       |   |        |   |
|-----|-------|---|--------|---|
| 147 | RIIFL | 5 | RIVVI  | 5 |
| 148 | IIFLR | 5 | IVVIRV | 6 |
| 149 | IFLRV | 5 |        |   |
| 150 |       |   | VIRVC  | 5 |
| 151 | LRVC  | 4 |        |   |
| 152 | RVCR  | 4 |        |   |

---

<sup>1</sup> absolute position, i.e., the amino acid position in the protein sequence; <sup>2</sup>: number of amino acids in the peptide.

**Table S4.** Details of unique peptides found in cathelicidin-1 of sheep or cattle origin after tryptic digest.

| Cathelicidin-1 of sheep origin      |                     |                 |                                  | Cathelicidin-1 of cattle origin     |        |                 |                     |
|-------------------------------------|---------------------|-----------------|----------------------------------|-------------------------------------|--------|-----------------|---------------------|
| Sequence of tryptic digest peptides | Length <sup>1</sup> | Unique peptides | No of CUPs <sup>2</sup> included | Sequence of tryptic digest peptides | Length | Unique peptides | No of CUPs included |
| METQR                               | 5                   | No              | 0                                | METPR                               | 5      | Yes             | 1                   |
| ASLSLGR                             | 7                   | No              | 0                                | ASLSLGR                             | 7      | No              | 0                   |
| CSLWLLLLGLA                         | 23                  | No              | 0                                | WSLWLLLLGLA                         | 23     | No              | 0                   |
| LPSASAQVLSYR                        |                     |                 |                                  | LPSASAQALSIR                        |        |                 |                     |
| EAVLR                               | 5                   | No              | 0                                | EAVLR                               | 5      | No              | 0                   |
| AVDQLNE                             | 16                  | Yes             | 7                                | AVDQLNE                             | 16     | Yes             | 6                   |
| QSSEPNIYR                           |                     |                 |                                  | QSSEPNIYR                           |        |                 |                     |
| LLELDQPPQ                           | 18                  | Yes             | 9                                | LLELDQPPQ                           | 18     | Yes             | 11                  |
| DDEDPDSPK                           |                     |                 |                                  | DDEDPDSPK                           |        |                 |                     |
| R                                   | 1                   | No              | 0                                | R                                   | 1      | No              | 0                   |
| VSFR                                | 4                   | No              | 0                                | VSFR                                | 4      | No              | 0                   |
| VK                                  | 2                   | No              | 0                                | VK                                  | 2      | No              | 0                   |
| ETVCPR                              | 6                   | No              | 0                                | ETVCSR                              | 6      | Yes             | 1                   |
| TTQQPPEQCDFK                        | 12                  | Yes             | 1                                | TTQQPPEQCDFK                        | 12     | Yes             | 3                   |
| ENGLLK                              | 6                   | No              | 0                                | ENGLLK                              | 6      | No              | 0                   |
| R                                   | 1                   | No              | 0                                | R                                   | 1      | No              | 0                   |
| CEGTVTLQVR                          | 11                  | Yes             | 2                                | CEGTVTLQVR                          | 11     | Yes             | 3                   |
| GNFDITCNNHQSIR                      | 14                  | Yes             | 6                                | GNFDITCNNHQSIR                      | 14     | Yes             | 7                   |
| ITK                                 | 3                   | No              | 0                                | ITK                                 | 3      | No              | 0                   |
| QPWAPPQAAR                          | 10                  | Yes             | 5                                | QPWAPPQAAR                          | 10     | Yes             | 5                   |
| ICR                                 | 3                   | No              | 0                                | LCR                                 | 3      | No              | 0                   |
| IIFLR                               | 5                   | No              | 0                                | IVVIR                               | 5      | No              | 0                   |
| VCR                                 | 3                   | No              | 0                                | VCR                                 | 3      | No              | 0                   |

<sup>1</sup> number of amino acids in the peptide; <sup>2</sup>: CUP: core unique peptide.



**Table S5.** Motifs of secondary structure of cathelicidin-1 of sheep origin in positions, where CUPs were identified.

| Start absolute position <sup>1</sup> | Sequence of core unique peptide | Length <sup>2</sup> | Motifs of protein secondary structure                                                      |
|--------------------------------------|---------------------------------|---------------------|--------------------------------------------------------------------------------------------|
| 31                                   | VLSYREAVLRAV                    | 12                  | 31-32: $\beta$ -sheet, 33-42: $\alpha$ -helix                                              |
| 44                                   | QLNEQ                           | 5                   | 44-48: $\alpha$ -helix                                                                     |
| 46                                   | NEQS                            | 4                   | 46-48: $\alpha$ -helix, 49: loop                                                           |
| 47                                   | EQSSE                           | 5                   | 47-48: $\alpha$ -helix, 49-51: loop                                                        |
| 48                                   | QSSEP                           | 5                   | 48: $\alpha$ -helix, 49-52: loop                                                           |
| 49                                   | SSEPN                           | 5                   | 49-52: loop, 53: $\beta$ -sheet                                                            |
| 51                                   | EPNI                            | 4                   | 51-52: loop, 53-54: $\beta$ -sheet                                                         |
| 53                                   | NIYR                            | 4                   | 53-56: $\beta$ -sheet                                                                      |
| 54                                   | IYRL                            | 4                   | 54-57: $\beta$ -sheet                                                                      |
| 58                                   | LELDQ                           | 5                   | 58-62: $\beta$ -sheet                                                                      |
| 59                                   | ELDQP                           | 5                   | 59-63: $\beta$ -sheet                                                                      |
| 61                                   | DQPP                            | 4                   | 61-64: $\beta$ -sheet                                                                      |
| 64                                   | PQDD                            | 4                   | 64: $\beta$ -sheet, 65-67: loop                                                            |
| 65                                   | QDDED                           | 5                   | 65-69: loop                                                                                |
| 67                                   | DEDP                            | 4                   | 67-70: loop                                                                                |
| 68                                   | EDPD                            | 4                   | 68-71: loop                                                                                |
| 69                                   | DPDS                            | 4                   | 69-72: loop                                                                                |
| 70                                   | PDSPK                           | 5                   | 70-72: loop, 73-74: $\beta$ -sheet                                                         |
| 71                                   | DSPKR                           | 5                   | 71-72: loop, 73-75: $\beta$ -sheet                                                         |
| 72                                   | SPKRV                           | 5                   | 72: loop, 73-76: $\beta$ -sheet                                                            |
| 73                                   | PKRVS                           | 5                   | 73-77: $\beta$ -sheet                                                                      |
| 74                                   | KRVSF                           | 5                   | 74-78: $\beta$ -sheet                                                                      |
| 75                                   | RVSFR                           | 5                   | 75-79: $\beta$ -sheet                                                                      |
| 79                                   | RVKETVCPRTT                     | 11                  | 79-86: $\beta$ -sheet, 87-89: loop                                                         |
| 89                                   | TQQPPEQ                         | 7                   | 89-92: loop, 93-95: $\beta$ -sheet                                                         |
| 93                                   | PEQCDFKENGLL                    | 12                  | 93-95: $\beta$ -sheet, 96: turn, 97-99: $\beta$ -sheet, 100-103: loop, 104: $\beta$ -sheet |
| 102                                  | GLLKR                           | 5                   | 102-103: loop, 104-106: $\beta$ -sheet                                                     |
| 103                                  | LLKRC                           | 5                   | 103: loop, 104-107: $\beta$ -sheet                                                         |
| 105                                  | KRCE                            | 4                   | 105-108: $\beta$ -sheet                                                                    |
| 106                                  | RCEG                            | 4                   | 106-109: $\beta$ -sheet                                                                    |
| 107                                  | CEGTV                           | 5                   | 107-111: $\beta$ -sheet                                                                    |
| 108                                  | EGTVT                           | 5                   | 108-111: $\beta$ -sheet, 112: loop                                                         |
| 115                                  | QVRG                            | 4                   | 115-118: loop                                                                              |
| 116                                  | VRGNF                           | 5                   | 116-119: loop, 120: $\beta$ -sheet                                                         |
| 118                                  | GNFD                            | 4                   | 118-119: loop, 120-121: $\beta$ -sheet                                                     |
| 122                                  | ITCN                            | 4                   | 122-125: $\beta$ -sheet                                                                    |
| 123                                  | TCNN                            | 4                   | 123-126: $\beta$ -sheet                                                                    |
| 124                                  | CNNH                            | 4                   | 124-126: $\beta$ -sheet, 127: loop                                                         |
| 125                                  | NNHQ                            | 4                   | 125-126: $\beta$ -sheet, 127-128: loop                                                     |

|     |       |   |                                                                 |
|-----|-------|---|-----------------------------------------------------------------|
| 127 | HQSI  | 4 | 127-130: loop                                                   |
| 129 | SIRI  | 4 | 129-132: loop                                                   |
| 130 | IRIT  | 4 | 130-133: loop                                                   |
| 131 | RITKQ | 5 | 131-135: loop                                                   |
| 133 | TKQP  | 4 | 133-136: loop                                                   |
| 134 | KQPW  | 4 | 134-137: loop                                                   |
| 136 | PWAP  | 4 | 136-137: loop, 138-139: $\beta$ -sheet                          |
| 137 | WAPPQ | 5 | 137: loop, 138-140: $\beta$ -sheet, 141: turn                   |
| 138 | APPQA | 5 | 138-140: $\beta$ -sheet, 141: turn, 142: $\alpha$ -helix        |
| 139 | PPQAA | 5 | 139-140: $\beta$ -sheet, 141: turn,<br>142-143: $\alpha$ -helix |
| 140 | PQAAR | 5 | 140: $\beta$ -sheet, 141: turn, 142-144: $\alpha$ -helix        |
| 141 | QAARI | 5 | 141: turn, 142-145: $\alpha$ -helix                             |
| 143 | ARICR | 5 | 143-147: $\alpha$ -helix                                        |
| 145 | ICRI  | 4 | 145-148: $\alpha$ -helix                                        |
| 146 | CRIIF | 5 | 146-150: $\alpha$ -helix                                        |
| 147 | RIIFL | 5 | 147-151: $\alpha$ -helix                                        |
| 148 | IIFLR | 5 | 148-152: $\alpha$ -helix                                        |
| 149 | IFLRV | 5 | 149-153: $\alpha$ -helix                                        |
| 151 | LRVC  | 4 | 151-153: $\alpha$ -helix, 154: turn                             |
| 152 | RVCR  | 4 | 152-153: $\alpha$ -helix, 154-155: turn                         |

---

<sup>1</sup> absolute position, i.e., the amino acid position in the protein sequence.

<sup>2</sup> number of amino acids in the peptide.

**Table S6.** Motifs of secondary structure of cathelicidin-1 of cattle origin in positions, where CUPs were identified.

| Start absolute position <sup>1</sup> | Sequence of core unique peptide | Length <sup>2</sup> | Motifs of protein secondary structure                                                                |
|--------------------------------------|---------------------------------|---------------------|------------------------------------------------------------------------------------------------------|
| 1                                    | METPR                           | 5                   | 1-4: turn, 5: $\alpha$ -helix                                                                        |
| 2                                    | ETPRA                           | 5                   | 2-4: turn, 5-6: $\alpha$ -helix                                                                      |
| 3                                    | TPRASL                          | 6                   | 3-4: turn, 5-8: $\alpha$ -helix                                                                      |
| 43                                   | DQLNEQ                          | 6                   | 43-48: $\alpha$ -helix                                                                               |
| 45                                   | LNEQS                           | 5                   | 45-48: $\alpha$ -helix, 49: loop                                                                     |
| 46                                   | NEQSSE                          | 6                   | 46-48: $\alpha$ -helix, 49-51: loop                                                                  |
| 47                                   | EQSSEPN                         | 7                   | 47-48: $\alpha$ -helix, 49-52: loop, 53: $\beta$ -sheet                                              |
| 48                                   | QSSEPNI                         | 7                   | 48: $\alpha$ -helix, 49-52: loop, 53-54: $\beta$ -sheet                                              |
| 51                                   | EPNIY                           | 5                   | 51-52: loop, 53-55: $\beta$ -sheet                                                                   |
| 52                                   | PNIYRL                          | 6                   | 52: loop, 53-57: $\beta$ -sheet                                                                      |
| 54                                   | IYRLLE                          | 6                   | 54-59: $\beta$ -sheet                                                                                |
| 57                                   | LLELDQ                          | 6                   | 57-62: $\beta$ -sheet                                                                                |
| 59                                   | ELDQP                           | 5                   | 59-63: $\beta$ -sheet                                                                                |
| 60                                   | LDQPP                           | 5                   | 60-64: $\beta$ -sheet                                                                                |
| 61                                   | DQPPQ                           | 5                   | 61-64: $\beta$ -sheet, 65: loop                                                                      |
| 63                                   | PPQDD                           | 5                   | 63-64: $\beta$ -sheet, 65-67: loop                                                                   |
| 64                                   | PQDDE                           | 5                   | 64: $\beta$ -sheet, 65-68: loop                                                                      |
| 65                                   | QDDEDP                          | 6                   | 65-70: loop                                                                                          |
| 66                                   | DDEDPD                          | 6                   | 66-71: loop                                                                                          |
| 67                                   | DEDPDS                          | 6                   | 67-72: loop                                                                                          |
| 68                                   | EDPDSP                          | 6                   | 68-72: loop, 73: $\beta$ -sheet                                                                      |
| 69                                   | DPDSPK                          | 6                   | 69-72: loop, 73-74: $\beta$ -sheet                                                                   |
| 70                                   | PDSPKR                          | 6                   | 70-72: loop, 73-75: $\beta$ -sheet                                                                   |
| 71                                   | DSPKRV                          | 6                   | 71-72: loop, 73-76: $\beta$ -sheet                                                                   |
| 72                                   | SPKRVS                          | 6                   | 2: loop, 73-77: $\beta$ -sheet                                                                       |
| 73                                   | PKRVSF                          | 6                   | 73-78: $\beta$ -sheet                                                                                |
| 75                                   | RVSFR                           | 5                   | 75-79: $\beta$ -sheet                                                                                |
| 81                                   | KETVCS                          | 6                   | 81-86: $\beta$ -sheet                                                                                |
| 82                                   | ETVCSR                          | 6                   | 82-86: $\beta$ -sheet, 87: loop                                                                      |
| 84                                   | VCSRT                           | 5                   | 84-86: $\beta$ -sheet, 87-88: loop                                                                   |
| 86                                   | SRTTQ                           | 5                   | 86: $\beta$ -sheet, 87-90: loop                                                                      |
| 87                                   | RTTQQ                           | 5                   | 87-91: loop                                                                                          |
| 88                                   | TTQQPP                          | 6                   | 88-92: loop, 93: $\beta$ -sheet                                                                      |
| 89                                   | TQQPPE                          | 6                   | 89-92: loop, 93-94: $\beta$ -sheet                                                                   |
| 90                                   | QQPPEQ                          | 6                   | 90-92: loop, 93-95: $\beta$ -sheet                                                                   |
| 92                                   | PPEQCDFKENGLL                   | 13                  | 92: loop, 93-95: $\beta$ -sheet, 96: turn, 97-99: $\beta$ -sheet, 100-103: loop, 104: $\beta$ -sheet |
| 101                                  | NGLLKR                          | 6                   | 101-103: loop, 104-106: $\beta$ -sheet                                                               |
| 102                                  | GLLKRC                          | 6                   | 102-103: loop, 104-107: $\beta$ -sheet                                                               |

|     |         |   |                                                                           |
|-----|---------|---|---------------------------------------------------------------------------|
| 104 | LKRCE   | 5 | 104-108: $\beta$ -sheet                                                   |
| 106 | RCEGT   | 5 | 106-110: $\beta$ -sheet                                                   |
| 107 | CEGTV   | 5 | 107-111: $\beta$ -sheet                                                   |
| 108 | EGTVTLD | 7 | 108-111: $\beta$ -sheet, 112-113: loop,<br>114: $\beta$ -sheet            |
| 111 | VTLDQVR | 7 | 111: $\beta$ -sheet, 112-113: loop,<br>114: $\beta$ -sheet, 115-117: loop |
| 114 | DQVRG   | 5 | 114: $\beta$ -sheet, 115-118: loop                                        |
| 115 | QVRGN   | 5 | 115-119: loop                                                             |
| 116 | VRGNF   | 5 | 116-119: loop, 120: $\beta$ -sheet                                        |
| 117 | RGNFDI  | 6 | 117-119: loop, 120-122: $\beta$ -sheet                                    |
| 118 | GNFDIT  | 6 | 118-119: loop, 120-123: $\beta$ -sheet                                    |
| 119 | NFDITCN | 7 | 119: loop, 120-125: $\beta$ -sheet                                        |
| 123 | TCNNH   | 5 | 123-126: $\beta$ -sheet, 127: turn                                        |
| 124 | CNNHQ   | 5 | 124-126: $\beta$ -sheet, 127-128: turn                                    |
| 125 | NNHQS   | 5 | 125-126: $\beta$ -sheet, 127-129: turn                                    |
| 126 | NHQSI   | 5 | 126: $\beta$ -sheet, 127-130: turn                                        |
| 127 | HQSIR   | 5 | 127-131: turn                                                             |
| 128 | QSIRIT  | 6 | 128-133: turn                                                             |
| 130 | IRITK   | 5 | 130-134: turn                                                             |
| 131 | RITKQP  | 6 | 131-136: turn                                                             |
| 133 | TKQPW   | 5 | 133-137: turn                                                             |
| 135 | QPWAP   | 5 | 135-139: turn                                                             |
| 136 | PWAPPQ  | 6 | 136-141: turn                                                             |
| 137 | WAPPQA  | 6 | 137-142: turn                                                             |
| 138 | APPQAA  | 6 | 138-143: turn                                                             |
| 139 | PPQAAR  | 6 | 139-144: turn                                                             |
| 140 | PQAARL  | 6 | 140-145: turn                                                             |
| 141 | QAARLC  | 6 | 141-146: turn                                                             |
| 142 | AARLCR  | 6 | 142-147: turn                                                             |
| 144 | RLCRI   | 5 | 144-148: turn                                                             |
| 145 | LCRIV   | 5 | 145-149: turn                                                             |
| 146 | CRIVV   | 5 | 146-150: turn                                                             |
| 147 | RIVVI   | 5 | 147-151: turn                                                             |
| 148 | IVVIRV  | 6 | 148-153: turn                                                             |
| 150 | VIRVC   | 5 | 150-154: turn                                                             |

---

<sup>1</sup> absolute position, i.e., the amino acid position in the protein sequence.

<sup>2</sup>: number of amino acids in the peptide.

**Figure S3.** Predicted three-dimensional structure of part of cathelicidin-1 of sheep, indicating in detail also the positions of core unique peptides (CUPs) proposed as potential antigenic targets on the protein structure (colour code of the protein structure: dark blue 'Very high' ( $pLDDT > 90$ ) estimate of confidence, light blue 'Confident' ( $90 \geq pLDDT > 70$ ) estimate of confidence, yellow 'Low' ( $70 \geq pLDDT > 50$ ) estimate of confidence, orange 'Very low' ( $pLDDT \leq 50$ ) estimate of confidence of the respective structure; red arrows indicate the position of the sequence of CUPs (solid lines indicate that the respective positions of CUPs are located on the appearing region of the 3-D structure of the protein, dashed lines indicate that the respective positions of CUPs are located beyond the appearing region of the 3-D structure of the protein); numbers indicate the absolute position, i.e., the amino acid position in the protein sequence)) (predicted aligned error plot (PAE plot) for the structure in Figure S5) (model constructed obtained from Uniprot [2023 <sup>1</sup>]). (a) start positions of CUPs in 44<sup>th</sup>, 46<sup>th</sup> and 47<sup>th</sup> amino acid position in the protein sequence; (b) start positions of CUPs in 68<sup>th</sup> and 69<sup>th</sup> amino acid position in the protein sequence.

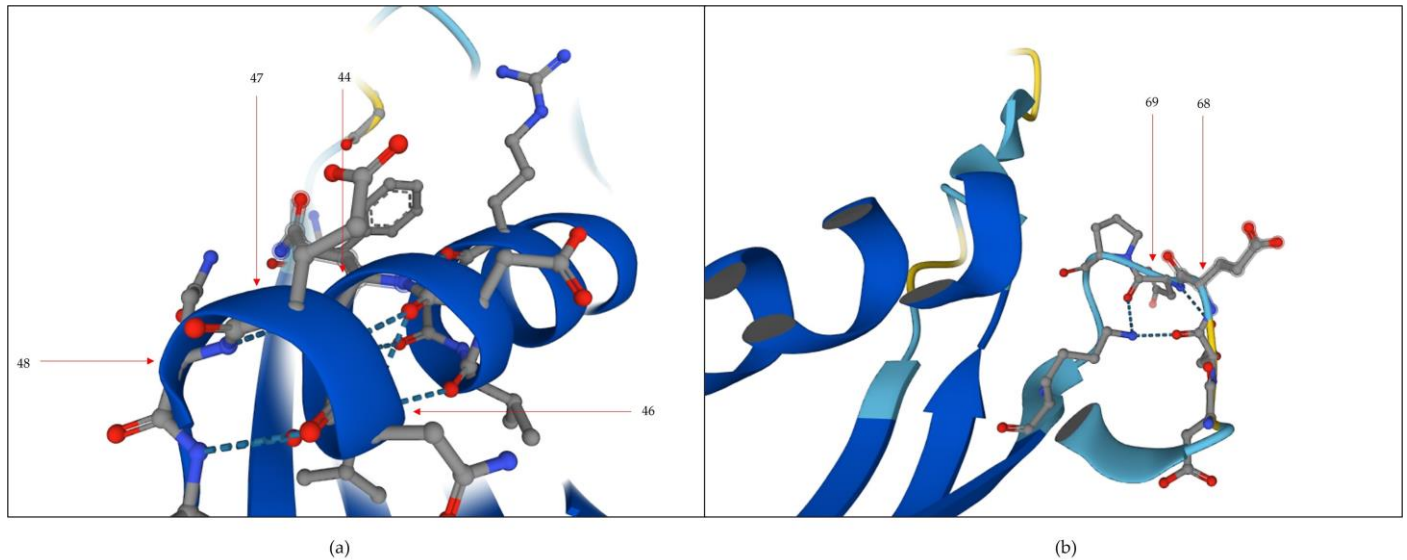

<sup>1</sup>: UniProt. P54230 CTHL1\_SHEEP, 2023, <https://www.uniprot.org/uniprotkb/P54230/entry> (accessed on 18 April 2023).

**Figure S4.** Predicted three-dimensional structure of part of cathelicidin-1 of cattle, indicating in detail also the positions of core unique peptides (CUPs) proposed as potential antigenic targets on the protein structure (colour code of the protein structure: dark blue 'Very high' ( $pLDDT > 90$ ) estimate of confidence, light blue 'Confident' ( $90 \geq pLDDT > 70$ ) estimate of confidence, yellow 'Low' ( $70 \geq pLDDT > 50$ ) estimate of confidence, orange 'Very low' ( $pLDDT \leq 50$ ) estimate of confidence of the respective structure; red arrows indicate the position of the sequence of CUPs (solid lines indicate that the respective positions of CUPs are located on the appearing region of the 3-D structure of the protein, dashed lines indicate that the respective positions of CUPs are located beyond the appearing region of the 3-D structure of the protein); numbers indicate the absolute position, i.e., the amino acid position in the protein sequence)) (predicted aligned error plot (PAE plot) for the structure in Figure S5) (model constructed obtained from Uniprot [2023 <sup>1</sup>]). (a) start positions of CUPs in 43<sup>rd</sup>, 45<sup>th</sup> and 46<sup>th</sup> amino acid position in the protein sequence; (b) start positions of CUPs in 46<sup>th</sup> amino acid position in the protein sequence; (c) start positions of CUPs in 87<sup>th</sup> amino acid position in the protein sequence.

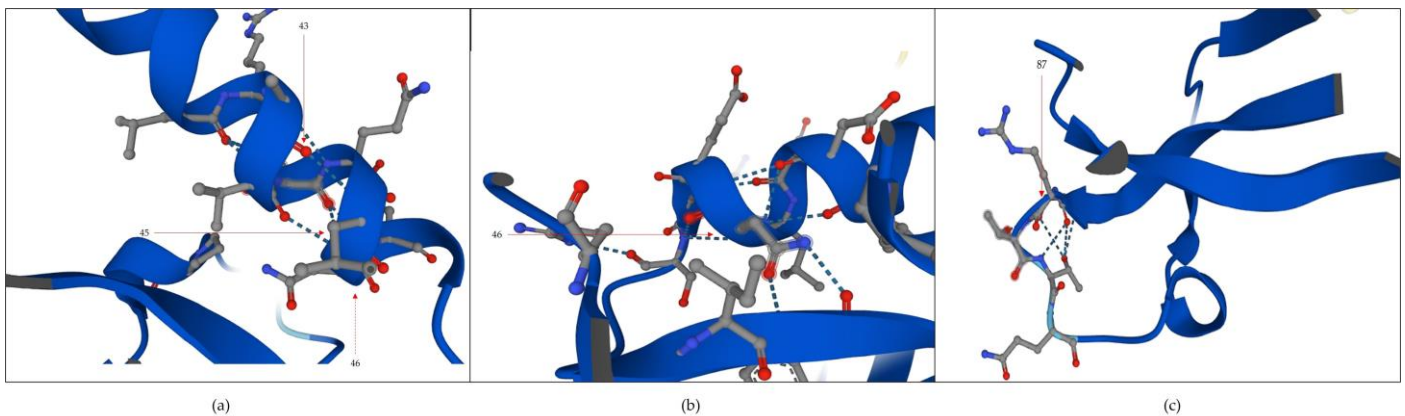

<sup>1</sup>: UniProt. P22226 CTHL1\_BOVIN, 2023, <https://www.uniprot.org/uniprotkb/P22226/entry> (accessed on 18 April 2023).

**Figure S5.** Predicted aligned error plot (PAE plot) of the three-dimensional structure (ribbon model) of cathelicidin-1 of sheep (a) or cattle (b) origin (plot obtained from AlphaFold Protein Structure Database [2023 <sup>1,2</sup>]).

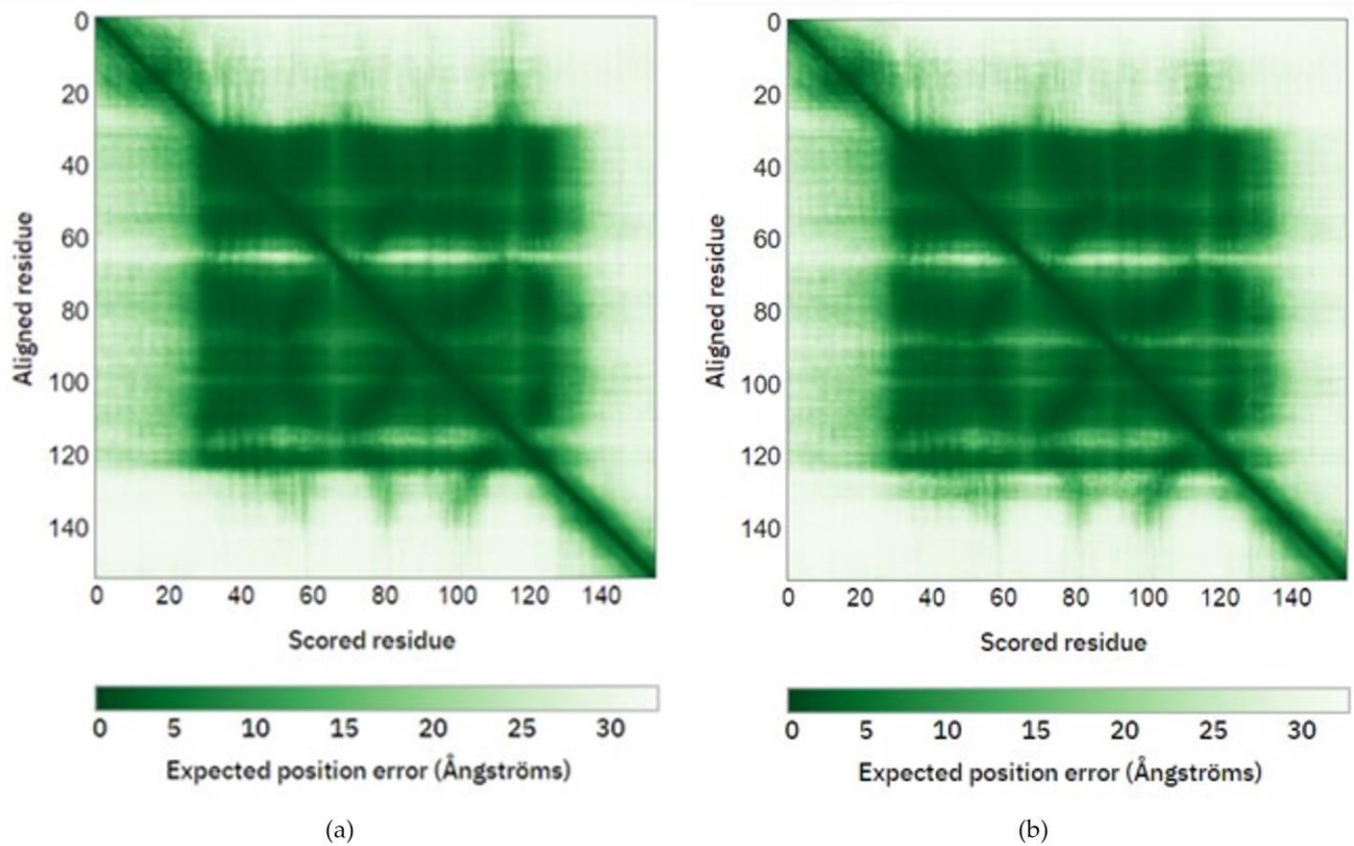

<sup>1</sup>: AlphaFold Protein Structure Database. Cathelicidin-1 AlphaFold structure prediction, 2023, [https://alphafold.ebi.ac.uk/entry/P54230?fbclid=IwAR0bPMzS62Q0j8hB-8Wr9n8f99ww29M8pkf0L\\_taYWprz8KrzG59GkaDSLK](https://alphafold.ebi.ac.uk/entry/P54230?fbclid=IwAR0bPMzS62Q0j8hB-8Wr9n8f99ww29M8pkf0L_taYWprz8KrzG59GkaDSLK) (accessed on 24 May 2023).

<sup>2</sup>: AlphaFold Protein Structure Database. Cathelicidin-1 AlphaFold structure prediction, 2023, [https://alphafold.ebi.ac.uk/entry/P22226?fbclid=IwAR31Qa\\_xJkxfjAI0sCZ9\\_Ph4r4DZv12w8WcqIJT3Fte3g4C4iFWfxYNF1sk](https://alphafold.ebi.ac.uk/entry/P22226?fbclid=IwAR31Qa_xJkxfjAI0sCZ9_Ph4r4DZv12w8WcqIJT3Fte3g4C4iFWfxYNF1sk) (accessed on 24 May 2023).
